# Supplementary material
Source: publisher figshare collection journal article supplement (https://sage.figshare.com/ndownloader/files/14144909)
Supplement: Supplementary file 1 [file 14144909]

**Table S2. Description of learning and screening algorithms in super learner (SL) library**

|                                                                            | R package    | Tuning parameters for instances of linear prediction (family = "gaussian")                                                                                                                     | Tuning parameters for instances of classification (family = "binomial")                                                                                                                        | Description                                                                                                                                                                                    |
|----------------------------------------------------------------------------|--------------|------------------------------------------------------------------------------------------------------------------------------------------------------------------------------------------------|------------------------------------------------------------------------------------------------------------------------------------------------------------------------------------------------|------------------------------------------------------------------------------------------------------------------------------------------------------------------------------------------------|
| <b>I. Learning algorithms</b>                                              |              |                                                                                                                                                                                                |                                                                                                                                                                                                |                                                                                                                                                                                                |
| Generalized linear models                                                  | stats        | none                                                                                                                                                                                           | none                                                                                                                                                                                           | Generalized linear regression model with a logit link (Nelder & Wedderburn, 1972)                                                                                                              |
| Generalized additive models                                                | gam          | deg.gam = 2 (quadratically penalized likelihood)<br>cts.num = 4 (considers variables with four+ categories as continuous)                                                                      | deg.gam = 2 (quadratically penalized likelihood)<br>cts.num = 4 (considers variables with four+ categories as continuous)                                                                      | Model with a logit link that estimates a summed vector of (not necessarily linear) functions for the predictors (Hastie & Tibshirani, 1986)                                                    |
| Neural networks                                                            | nnet         | size = 2 (number of units in a hidden layer); tested size = 5, 10 in a sensitivity analysis<br>decay = 0 (weight decay parameter)<br>rang = 0.5 (default[-rang, rang], initial random weights) | size = 2 (number of units in a hidden layer); tested size = 5, 10 in a sensitivity analysis<br>decay = 0 (weight decay parameter)<br>rang = 0.5 (default[-rang, rang], initial random weights) | Single-hidden-layer neural network algorithm (Cochocki & Unbehauen, 1993)                                                                                                                      |
| <b>II. Screening algorithms — applied to all classification algorithms</b> |              |                                                                                                                                                                                                |                                                                                                                                                                                                |                                                                                                                                                                                                |
| corP                                                                       | stats        | Method = 'pearson'<br>minPvalue = 0.1<br>minscreen = 2                                                                                                                                         | Method = 'pearson'<br>minPvalue = 0.1<br>minscreen = 2                                                                                                                                         | Predictor variables that are associated with the outcome at p-value <0.1 are selected; requires a minimum of two predictors to enter the model (Pearson, 1895)                                 |
| randomForest                                                               | randomForest | nVar = 10<br>ntree = 1000<br>mtry = (floor(sqrt(ncol(X))))<br>nodesize = 5                                                                                                                     | nVar = 10<br>ntree = 1000<br>mtry = max(floor(sqrt(ncol(X)/3), 1))<br>nodesize = 1                                                                                                             | Random trees grown in bagged samples of data and validated on unbagged data to select the best-ranked predictors of the outcome, resulting in a forest of decision trees (Liaw & Wiener, 2002) |

**References**

Cochocki, A., & Unbehauen, R. (1993). *Neural networks for optimization and signal processing*. New York, NY: John Wiley & Sons, Inc.

Hastie, T., & Tibshirani, R. (1986). Generalized additive models. *Statistical Science*, 1, 297-310. doi:10.1214/ss/1177013604

Liaw, A., & Wiener, M. (2002). Classification and regression by randomForest. *R News*, 2, 18-22. Retrieved from [https://www.r-project.org/doc/Rnews/Rnews\\_2002-3.pdf](https://www.r-project.org/doc/Rnews/Rnews_2002-3.pdf)

Nelder, J., & Wedderburn, R. (1972). Generalized linear models. *Journal of the Royal Statistical Society. Series A (General)*, 135, 370-384. doi:10.2307/2344614.

Pearson, K. (1895). Notes on regression and inheritance in the case of two parents. *Proceedings of the Royal Society of London*, 58, 240-242.
